# Supplementary material
Source: ML conference proceedings conference paper supplement (https://openreview.net/forum?id=H4Po2dDzdFq)
Supplement: supplementary_material [file attachment]

## **Acknowledgments**

We thank Emanuel Jampen. His work on initial processing of the OEIS dataset showed the feasibility of this project. We also thank Neil Sloane for founding the OEIS project and sharing it in public domain.

## A OEIS Processing

The On-Line Encyclopedia of Integer Sequences[35], OEIS for short, is an online dataset of integer sequences. Founded in 1996 by Neil Sloane the dataset was since then steadily expanded by amateur and professional mathematicians as well. In 18 columns the dataset provides information about various properties of those sequences. The 18 column names are briefly explained in Appendix A. We worked with an offline version of the OEIS dataset which contains 342 304 sequences. On a content level they range from well known like A000045, Fibonacci numbers:  $F(n) = F(n-1) + F(n-2)$  with  $F(0) = 0$  and  $F(1) = 1$ , over simple ones like, A000004: the zero sequence and complex ones like A339123: number of 2-connected multigraphs with  $n$  edges and rooted at two indistinguishable vertices and have no decomposition into parallel components rooted at the two distinguished vertices, to quite creative ones like A001049: numbered stops in Manhattan on the Lexington Avenue subway. A detailed summary can be found in [39].

**Field Names** In this section we give a brief explanation of the 18 fields in the OEIS dataset. This is based on the style sheet provided by OEIS [37].

- **oeis\_id**  
A unique 6 digit number preceded by an "A". For example A005735
- **identification**  
This refers to the ID the given sequence had in one of the books *A Handbook of Integer Sequences*[38] (M followed by a 4-digit number) or *The Encyclopedia of Integer Sequences*[40] (N followed by a 4-digit number).
- **value\_list**  
A list of comma separated integers. The actual sequence of interest. Depending on the sequence in question the length of this list can vary by some orders of magnitude. For example A058445 contains only one element while the value list of A175320 has a length of 1 578 727.
- **name**  
A brief explanation of the sequence. Sometimes, when possible, this already contains an easy-to-use formula to generate the sequence. For example A005843 has the name *The nonnegative even numbers:  $a(n) = 2n$ .*
- **comments**  
Further general details and side-notes about the sequence that would make the name too long. Here we often can find alternative formulas to generate the sequence or different places in all of mathematics where this sequence pops up. For example one of the comments of sequence A000045, the Fibonacci Numbers, is *"Also the number of independent vertex sets and vertex covers in the  $(n-2)$ -path graph."*
- **detailed\_references**  
References to journal papers and books that can not be linked in the "links" field.
- **links**  
References to material which can be accessed online.
- **formulas**  
Generating functions, closed formulas and other methods to calculate the sequence.
- **examples**  
Examples of how to find a term of the sequence and how to interpret its value.
- **maple\_programs**  
Programs written in maple to generate elements of the sequence.
- **mathematica\_programs**  
Programs written in mathematica to generate elements of the sequence.
- **other\_programs**  
Programs written in programming languages other than maple or mathematica (for example python) to generate elements of the sequence.

| Field name            | Valid entries | Invalid entries |
|-----------------------|---------------|-----------------|
| oeis_id               | 342304        | 0               |
| identification        | 5533          | 336771          |
| value_list            | 341889        | 415             |
| name                  | 342304        | 0               |
| comments              | 198198        | 144106          |
| detailed_references   | 33687         | 308617          |
| links                 | 237038        | 105266          |
| formulas              | 149606        | 192698          |
| examples              | 163666        | 178638          |
| maple_programs        | 53333         | 288971          |
| mathematica_programs  | 168158        | 174146          |
| other_programs        | 121276        | 221028          |
| cross_references      | 245298        | 97006           |
| keywords              | 342304        | 0               |
| offset_a              | 341885        | 419             |
| offset_b              | 340578        | 1726            |
| author                | 340455        | 1849            |
| extensions_and_errors | 77949         | 264355          |

Table 2: Number of Valid and Invalid entries per field

- **cross\_reference**  
References to other sequences in the dataset which are related in some way.
- **keywords**  
Keywords from a short set of possibilities. For example *nonn* is used for sequences that have no negative values currently in their respective *value\_list* field.
- **offset\_a**  
Index of the first element in the *value\_list*. For example *A005843*, the aforementioned sequence of "*The nonnegative even numbers:  $a(n) = 2n$ .*", has an *offset\_a* of 0 because the first element is calculated by  $a(0) = 2 * 0$ , i.e. the index is 0.
- **offset\_b**  
Index of the first element that has an absolute value larger than 1.
- **author**  
Name of the original contributor and date of first contribution.
- **extensions\_and\_errors**  
Used to claim credit for additions to the entry that can't be properly acknowledged in other fields.

## A.1 Characteristics

In this section, we introduce some other characteristics of the dataset that required preprocessing and extensions.

- **NULL Values**  
Not every sequence contains information in every of the 18 columns. Table 2 shows the number of valid entries per column in the dataset. We say an entry is valid if it is not *NULL*. When programming classification methods these invalid entries have to be taken into consideration. Of course this can be a limitation for the meaningfulness of such classification methods. For example we can not check whether the *formulas* field contains a Fibonacci-Like formula when it is *NULL*. However, the fact that the field is *NULL* can also be a hint that no known closed formula exists (otherwise someone would probably contribute it to the OEIS).
- **Sequence lengths**  
Since it is harder to calculate elements for some sequences than for others, the length of the *value\_list* shows a high variance. Figure 5 shows the distribution of sequence lengths

| Keyword | Occurrences |
|---------|-------------|
| base    | 39097       |
| bref    | 739         |
| cofr    | 2866        |
| cons    | 11454       |
| core    | 178         |
| dead    | 1684        |
| dumb    | 99          |
| easy    | 79148       |
| eigen   | 430         |
| fini    | 6594        |
| frac    | 7050        |
| full    | 5494        |
| hard    | 7137        |
| hear    | 162         |
| less    | 2683        |
| look    | 2829        |
| more    | 20107       |
| mult    | 2120        |
| nice    | 6891        |
| nonn    | 321805      |
| obsc    | 120         |
| sign    | 18480       |
| tabf    | 6442        |
| tabl    | 20248       |
| unkn    | 32          |
| walk    | 4285        |
| word    | 749         |

Table 3: Number of occurrences of each keyword

over two different scales. As we can see there is a substantial number of sequences with short sequence lengths (say less than 30). Short sequence lengths can pose a problem to classification methods that need more elements for some mathematical calculations. For example we can fit a polynomial of degree 20 to 21 datapoints, but then we can not validate the result on additional datapoints.

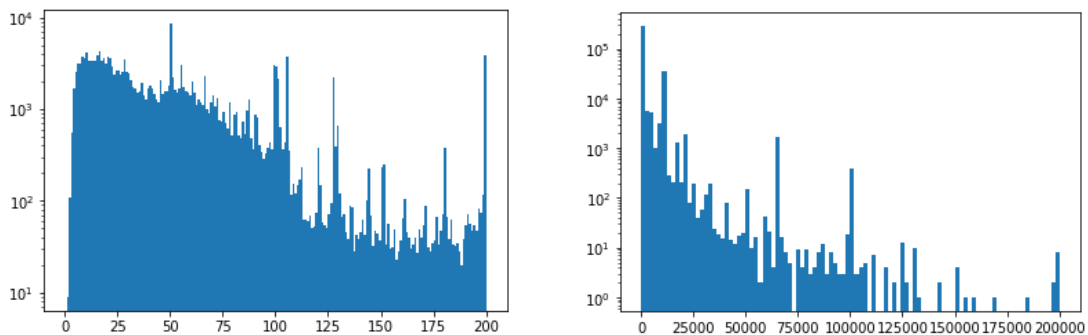

Figure 5: Distribution of sequence lengths. *Left*. The horizontal axis corresponds to the sequence length, while the vertical axis has logarithmic scale and gives the count of the sequences with such length. *Right*. The same data as on the left but with the roles of axes exchanged.

- **Keyword counts**

Table 3 shows the number of occurrences of each of the 27 possible keywords. Again, for a full description of what each keyword means see the corresponding Wiki page from OEIS [36].

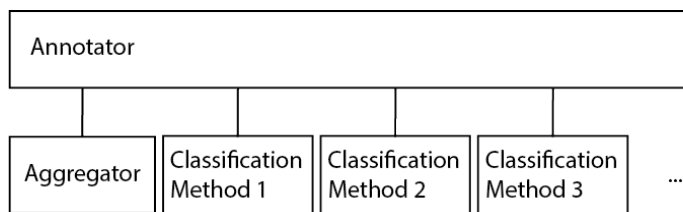

Figure 6: Structure of the Annotator Class with multiple Classification Methods and an Aggregator

## A.2 Processing methods

In order to group similar sequences from OEIS together we create categories and decide for each sequence whether they belong into this category or not. Since for some sequences it is not immediately clear whether they belong to a given category or not, we relaxed the requirement of this binary classification to a finer graduated classification. To this end, we have 5 different levels of membership, represented by integers 0 through 4. These values indicate how confident our classification is, as seen in the following table:

- 0 Does likely not belong in this category
- 1 More likely than not does not belong in this category
- 2 Inconclusive
- 3 More likely than not belongs in this category
- 4 Does likely belong in this category

In this chapter we introduce and explain methods we used to define categories and create the associated labels for membership. Neither our selection of categories nor the different Classification Methods are exhaustive, therefore we implemented an easy to use framework which enables a fast creation of new categories. This framework is explained in the following Section A.3.

## A.3 The Annotator Class

We implemented the Annotator Class which lets a user create new categories of sequences. Each instance of the Annotator Class is responsible for one category. As depicted in Figure 6 each Annotator is linked to an *Aggregator* and one or more *Classification Methods* (see Sections A.4 and A.5 below). The Annotator is responsible for running all its Classification Methods for each sequence, providing the Aggregator with results and storing the 5-Level membership results for future use.

## A.4 Aggregator

An Aggregator, as the name suggests, aggregates the results from the Classification Methods and returns a 5-Level membership value.

## A.5 Classification Methods

Classification Methods are functions which take all the information about a sequence (i.e. all the fields described in Section A) as an input and return results of some test which are then further processed by the Aggregator.

Note, all Classification Methods have to check whether the fields which have to be accessed by the test do exist for the given sequence, i.e. the field is not empty or NULL.

As we will see in the following subsections, a Classification Method can be something as simple as searching for a given word in the name of the sequence or more complex like doing some advanced calculations based on the value. However, Classification Methods should be designed to have a rather short runtime per sequence since the same function has to run on all sequences in the dataset. As a rule of thumb, when a test takes one second per sequence the total runtime on the current dataset will be about 4 days.

**Mathematical** We used Mathematical Tests to check for properties of the values of the sequences. These methods bear some limitations one needs to be aware off. Some tests require a minimal number of values to return meaningful results. For example a sequence with only 5 given values is not suitable for fitting a polynomial of degree 10 to it. On the other hand if the sequence truly would have a polynomial form then elements would be easy to calculate and there would probably be more values provided. Following are descriptions of the mathematical Classification Methods we used.

- **Newton's Divided Difference** We used Newton's Divided Difference Method to calculate the degree a polynomial would have to have in order to fit to the values of the sequence. Intuitively this is the discrete signal analog of repeatedly taking the derivative of a polynomial until we end up with the constant 0 function. By counting the number of iterations, we get the degree a fitting polynomial would need to have, which we can then use for Polynomial Interpolation.
- **Polynomial Interpolation**  
We used the SymPy[43] library to perform symbolic polynomial interpolation with the degree calculated by Newton's Divided Difference Method. This allows us to fit a polynomial of degree  $n$  to the first  $n + 1$  values of the sequence and use the remaining values to calculate the error between the fitted polynomial and the actual values. Of course we need to assert that there are enough values, which were not used during interpolation, to be able to calculate a meaningful error. In cases where the error between the fitted polynomial and the actual values is 0 and we have enough values, we conclude that the sequence in question indeed has a polynomial form.
- **Exponentials**  
To detect exponential sequences, such as A000244, *Powers of 3*, or A007689,  $a(n) = 2^n + 3^n$ , directly from their values  $a_i$  we first calculate the sequence of quotients  $q$ . Each element of  $q$  is the quotient of two subsequent elements of the original sequence:

$$q_i = a_i/a_{i+1} \tag{1}$$

Purely exponential sequences, like *Powers of 3*, produce a constant-valued  $q$ . In our example  $q_i = 1/3$  for all  $i$ . Such sequences pass this test immediately.

Sequences that are dominated by an exponential like A006127,  $a(n) = 2^n + n$ , produce a sequence of quotient that approaches a constant value. In this example we get

$$\lim_{i \rightarrow \infty} q_i = \lim_{i \rightarrow \infty} \frac{2^i + i}{2^{i+1} + i + 1} = \frac{1}{2} \tag{2}$$

We approximate the limit of  $q$  by checking the very last values of it that can be calculated from the given data. If the last 30 elements are all within some threshold range of the final value we conclude that the sequence probably is dominated by an exponential function.

- **Primality**  
Using SymPy again, we tested which sequences can be interpreted as the application of the above classes of functions to prime numbers. The way we implemented this test was limited to numbers smaller than  $2^{64}$  (or about  $10^{19}$ ).
- **Boundedness**  
Testing the absolute values of the sequence elements for boundedness by different values, is an easy but insightful series of tests.
- **Palindrome**  
This test checks whether all elements in a sequence are palindromic, i.e. if all values are numbers that are the same when read from left to right as well as from right to left. Trivially this is true for all sequences that contain only values smaller than 10 since all single-digit numbers are palindromic (i.e. 7 is the same number when read from either direction). The results from this test depend on the base of the number system used to display the values of the sequence. For example 12321 is palindromic in base 10 but in base 2 it is not:  $12321_{10} = 11000000100001_2$ .
- **Periodicity**  
We tested whether a sequence has a repeating part up to a maximal period length of 10 000 elements. To pass the test a sequence needs to have at least 3 full periods in the *value\_list*.

**String Search** Since most of the fields in the dataset are populated by plain text, one of the easiest methods to get information about a sequence is the search for specific words or strings within a given fields. This method can be a reliable indicator whether a sequence does belong to a category, for example performing a string search of the word *prime* on the name of A098682, *Smallest prime larger than  $n^n$* , can serve as a good indicator that A098682 indeed is at least in some way related to prime numbers. However, the opposite conclusion is harder to draw, is a sequence truly unrelated to prime numbers just because it is not mentioned in the name or comments?

**Regular Expressions** Regular Expressions served as a powerful tool to check for patterns in the data. For example we created the regular expression

```
a\(n\)=\[0-9\]*\?*a\(n\[\+\-\] \[0-9\]+\)\ \[\+\-\] \[0-9\]*\?*
a\(n\[\+\-\] \[0-9\]+\)\ (\[\+\-\] \[0-9\]*\?*a\(n\[\+\-\] \[0-9\]+\)\)*
```

Which matches character patterns like

$$a(n) = 2 * a(n - 3) + 5 * a(n - 5) - 17a(n - 5) \quad (3)$$

Due to the similarity with the well known Fibonacci Sequence (A000045), we call sequences with formulas that are matched by above regular expression *Fibonacci-Like*.

## B Synthetic Generation

In this section we explain the steps followed to create synthetic sequences.

From the identified categories (cf. fig. 2) in the OEIS database, we have elected a significant and representative subset and augmented their organic entries with synthetic data. For each category, a total of 500K synthetic sequences have been generated. The sequences were generated with logarithmically increasing length of the generating formula. This way, most of the sequences-generating expressions are relatively short (motivated by Kolmogorov complexity, cf. Section 2), but longer sequences remain playing a significant role in the dataset. In the following, we provide information how synthetic extensions of each sequence category are created using context-free grammars. Typically, the “logical” terminals in our grammars are  $\{Var, Const\}$  and the non-terminals  $\{Add, Sub, Mult, NConst, Pow\}$ . *NConst* is defined as the non-terminal which represents the number constants with multiple digits. The reason why we consider it a non-terminal is that we count the length of polynomial based on the number of non-terminals only.

**Polynomial** The context-free grammar for polynomials is defined as:

```
T → Var | Const
N → Add | Sub | Mult | Pow | NConst | T
Add → (N + N)
Sub → (N - N)
Mult → (N * N)
Pow → (N ** NConst)
NConst → (ConstPos NConst) | Const
Var → x
Const → 0 | 1 | 2 | 3 | 4 | 5 | 6 | 7 | 8 | 9
ConstPos → 1 | 2 | 3 | 4 | 5 | 6 | 7 | 8 | 9
```

**Exponential** Context-free grammar of exponentials group is defined as:

```
T → Var | Const
N → Add | Sub | Mult | Pow | NConst | T
Add → (N + N)
Sub → (N - N)
Mult → (N * N)
Pow → (N ** N)
NConst → (ConstPos NConst) | Const
Var → x
```

$$\begin{aligned} Const &\rightarrow 0 \mid 1 \mid 2 \mid 3 \mid 4 \mid 5 \mid 6 \mid 7 \mid 8 \mid 9 \\ ConstPos &\rightarrow 1 \mid 2 \mid 3 \mid 4 \mid 5 \mid 6 \mid 7 \mid 8 \mid 9 \end{aligned}$$

**Prime** In this group, we introduce a non terminal  $Prime(x)$ , which evaluated at value  $x \in \{1, 2, \dots\}$  returns the  $i^{th}$  prime number. That is,  $Prime(1) = 2$ ,  $Prime(2) = 3$ ,  $Prime(3) = 5$ , and so on. This way we inject in our sequences prior knowledge about prime numbers. More concretely, the context free grammar is defined as:

$$\begin{aligned} T &\rightarrow Var \mid Const \\ N &\rightarrow Add \mid Sub \mid Mult \mid Pow \mid NConst \mid Prime \mid T \\ Add &\rightarrow (N + N) \\ Sub &\rightarrow (N - N) \\ Mult &\rightarrow (N * N) \\ Pow &\rightarrow (N ** N) \\ NConst &\rightarrow (ConstPos NConst) \mid Const \\ Var &\rightarrow x \\ Prime &\rightarrow prime(x) \# \text{ defined as a function} \\ Const &\rightarrow 0 \mid 1 \mid 2 \mid 3 \mid 4 \mid 5 \mid 6 \mid 7 \mid 8 \mid 9 \\ ConstPos &\rightarrow 1 \mid 2 \mid 3 \mid 4 \mid 5 \mid 6 \mid 7 \mid 8 \mid 9 \end{aligned}$$

**Periodic** Periodic group makes use of the previous grammars, but it also has a non terminal that is added in the root of the grammar, which makes the whole sequence repeat only the first few  $k$  numbers. More concretely, we can phrase this as a grammar too, by adding primitive  $Periodic$  as a root of the grammar

$$\begin{aligned} Periodic &\rightarrow periodic(N, k) \# \text{ defined as a function} \\ k &\rightarrow NConst \\ N &\rightarrow \dots \text{ as above } \dots \end{aligned}$$

Let sequence  $f(x)$  be any sequence, then the function  $periodic(f(x), k)$  is defined as  $f(x\%k)$ .

**Modulo** In this group we add a non terminal modulo and we define the grammar as:

$$\begin{aligned} T &\rightarrow Var \mid Const \\ N &\rightarrow Add \mid Sub \mid Mult \mid Pow \mid NConst \mid Modulo \mid T \\ Add &\rightarrow (N + N) \\ Sub &\rightarrow (N - N) \\ Mult &\rightarrow (N * N) \\ Pow &\rightarrow (N ** N) \\ NConst &\rightarrow (ConstPos NConst) \mid Const \\ Var &\rightarrow x \\ Modulo &\rightarrow N \% N \\ Const &\rightarrow 0 \mid 1 \mid 2 \mid 3 \mid 4 \mid 5 \mid 6 \mid 7 \mid 8 \mid 9 \\ ConstPos &\rightarrow 1 \mid 2 \mid 3 \mid 4 \mid 5 \mid 6 \mid 7 \mid 8 \mid 9 \end{aligned}$$

**Trigonometric** Here we add two non terminals  $Sin$  and  $Cos$ . The grammar defined in this group can be found in the following.

$$\begin{aligned} T &\rightarrow Var \mid Const \\ N &\rightarrow Add \mid Sub \mid Mult \mid Pow \mid NConst \mid Sin \mid Cos \mid T \\ Add &\rightarrow (N + N) \\ Sub &\rightarrow (N - N) \\ Mult &\rightarrow (N * N) \\ Pow &\rightarrow (N ** N) \\ NConst &\rightarrow (ConstPos NConst) \mid Const \\ Var &\rightarrow x \\ Sin &\rightarrow sin(pi * (N)) \\ Cos &\rightarrow cos(pi * (N)) \\ Const &\rightarrow 0 \mid 1 \mid 2 \mid 3 \mid 4 \mid 5 \mid 6 \mid 7 \mid 8 \mid 9 \\ ConstPos &\rightarrow 1 \mid 2 \mid 3 \mid 4 \mid 5 \mid 6 \mid 7 \mid 8 \mid 9 \end{aligned}$$



**Finite** Finite is a simple group where we only create a list of finite numbers. They are created the same way by using previous rules but they are cut at a specific place randomly.

**Increasing** The next three groups are meta-categories, for which no specific grammar is used, but the property is inferred afterwards. If the sequence generated is monotonically increasing, then it is labelled as increasing.

**Bounded** If the sequence is bounded by a number, then it is labelled as bounded. For example  $\sin(\pi * x)$  is bounded.

**Unique** If all numbers in the sequence are distinct, then it is marked as unique. We generate at least first 500 numbers of the sequence to check this property. Of course, this may not be the case for the numbers appearing later in the sequence.

## B.1 Hosting and Maintenance of the Dataset

The dataset is available through the ETH Research Collection and is directly accessible with DOI 10.3929/ethz-b-000562705 [5]. The ETH Research Collection guarantees minimal data retention period of 10 years. The presence of the dataset will be maintained by the D-ITET DISCO and ISG groups. Members of DISCO will also be responsible for the maintenance of the dataset in response to queries or any errors found and reported – please email fact@ethz.ch to do so.

## C Baseline Models

To provide baselines for model performance on the above tasks, we use a total of 24 different models across our bench-marking tasks, namely 4 neural models, 9 classical classifiers, and 11 standard regressors. The following sections describe the architecture of these models. For consistency, we used the random seed 1234 wherever it could be specified.

### C.1 Neural Models

#### C.1.1 Dense Neural Network

The densely connected neural network is composed of three hidden layers with 64, 32 and 16 neurons each, and an input layer with 50 neurons, corresponding to the first 50 integers of the sequence. Each hidden neuron is activated with the rectified function (ReLU). The last layer is activated with the sigmoid function in case of classification tasks, and linearly activated in case of regression. In multi-class-classification, 10 output neurons with sigmoid activation (one for each main class) are used.

In terms of hyperparameter-tuning, we focused on the depth layout and kernel regularisations. Our grid search contained the following discrete ranges for each parameter: L1  $\in [0.005, 0.01, 0.02]$ , L2  $\in [0.0001, 0.001, 0.01]$ , depth-layout  $\in [(64, 32, 16, 8, 4), (64, 32, 16), (16, 16, 16)]$

#### C.1.2 Recurrent Neural Network

The architecture of our recurrent model consists of three Long Short-Term Memory [15] layers, each with 64, 32 and 16 units respectively. The first two layers produce the whole sequence, whereas the last layer only yields the last output. The units of the last layer are fed into a dense-layer with a sigmoidal or linear activation. No dropout was used for RNNs. The hyperparameter-grid-search included: L1  $\in [0, 0.001, 0.01]$ , L2  $\in [0, 0.0001, 0.001]$ , Dropout  $\in [0, 0.1]$

#### C.1.3 Convolutional Neural Network

Here we used a simple stack containing a convolutional layer with kernel size 2, 10 filters and a pooling-layer of size 2, with unit strides. The network was composed of three of these stacks, terminating in a dense layer with the same activation as above. The hyperparameter-tuning focused on filter and kernel size: filters  $\in [1, 5, 10]$ , kernel size  $\in [2, 4, 6]$ , stack depth  $\in [2, 3]$

### C.1.4 Transformer

We followed the transformer architecture of [44] with only the normalisation layers excluded. We use six transformer blocks for the encoder and three for the decoder decoder. Each multi-headed attention unit consists of 20 attention heads and the output dimension of the embedding and feed-forward layers is 12. We focused on the number of attention heads as well as the embedding dimension in our grid search: heads  $\in [5, 10, 20, 40]$ , embedding dimension  $\in [3, 6, 12, 24]$ .

### C.2 Standard Classifiers and Regressors

Table 4 summarizes all standard classifiers and regressors we used. Each standard model is implemented with the scikit-learn [27] library for python. For each model we used its standard parameters. Classification performance is measured in binary-accuracy whereas multiclass performance across all categories is measured with macro-averaged F1-score.

| Classifiers |                            | Regressors |                     |
|-------------|----------------------------|------------|---------------------|
| KNNC        | k-Nearest Neighbors        | KNNR       | k-Nearest Neighbors |
| GNBC        | Gaussian naive Bayes       | LIR        | Linear Regressor    |
| LSVC        | Linear Sup. Vector Machine | RIR        | Ridge Regressor     |
| DTC         | Decision Tree              | LAR        | Lasso Regressor     |
| RFC         | Random Forest              | ENR        | Elastic Net         |
| GBC         | Gradient Boosting          | DTR        | Decision Tree       |
| ABC         | AdaBoost                   | RFR        | Random Forest       |
| XGBC        | XG Boost                   | GBR        | Gradient Boosting   |
| DYC         | Dummy Classifier           | ABR        | AdaBoost            |
|             |                            | XGBR       | XGBoost             |
|             |                            | DYR        | Dummy Regressor     |

Table 4: Standard Models

|                         |        |
|-------------------------|--------|
| Max # of Epochs         | 20     |
| Optimizer               | Adam   |
| DNN L1 regularizer      | 0.001  |
| DNN L2 regularizer      | 0.0001 |
| RNN L1 regularizer      | 0.001  |
| RNN L2 regularizer      | 0.0001 |
| RNN dropout probability | 0      |
| CNN filter count        | 10     |
| margin distance         | 1      |

Table 5: Additional general training hyperparameters

### C.3 Loss and Metrics

#### C.3.1 Binary-Crossentropy

For our tasks in static mode we used binary-crossentropy as a loss for classification and mean squared logarithmic error for regression.

#### C.3.2 Flexible Contrastive Loss

In dynamic mode we went for a contrastive loss described in the following formula:

$$\begin{aligned}
 d_a &= \max(\alpha - d, 0)^2 \\
 d_n &= d^2 \\
 L &= (1 - \lambda)d_a + \lambda d_n
 \end{aligned}
 \tag{4}$$

where  $d$  is the euclidean distance between two sequences in the embedding space and  $\alpha$  is the margin-distance which penalises dissimilar pairs only if their distance  $d$  is inside its radius. The goal of this

loss is to embed similar sequences near each other in terms of the euclidean distance and different ones further away. The parameter  $\lambda$  functions as a measurement of similarity. In each dynamic task we define this measurement differently. In sequence similarity,  $\lambda$  is the indicator function between two classes. In sequence continuation,  $\lambda$  is the fraction between the first  $n$  similar numbers of two sequences and its total length, whereas in sequence unmasking  $\lambda$  is the fraction of masked entries in a sequence paired with its unmasked counterpart. With this approach we seek to build an embedding space that learns to differentiate different sequences according to our tasks given.

#### **C.4 Hosting and Maintenance of the Benchmarking Baseline Models**

The benchmarking baseline models are available through the ETH Research Collection and are directly accessible through DOI 10.3929/ethz-b-000565644 [4]. The ETH Research Collection guarantees minimal data retention period of 10 years. The presence of the models will be maintained by the D-ITET DISCO and ISG groups. Members of DISCO will also be responsible for the maintenance of the models in response to queries or any errors found and reported – please email [fact@ethz.ch](mailto:fact@ethz.ch) to do so.

## D Baseline Model Performance

| Model                         | Dataset | Scope             |              |               |              |              |              |              |              |              |              |              |
|-------------------------------|---------|-------------------|--------------|---------------|--------------|--------------|--------------|--------------|--------------|--------------|--------------|--------------|
|                               |         | Within            |              |               |              |              |              |              |              |              |              | Across       |
|                               |         | polynomial        | exponential  | trigonometric | periodic     | finite       | modulo       | prime        | bounded      | increasing   | unique       | all classes  |
| Sequence Classification       |         | [binary-accuracy] |              |               |              |              |              |              |              |              |              | [f1-score]   |
| DNN                           | oeis    | 0.634             | 0.575        | 0.621         | 0.451        | n.a.         | 0.458        | 0.545        | 0.815        | 0.666        | 0.776        | 0.330        |
|                               | synth   | 0.784             | 0.754        | 0.815         | 0.746        | 0.748        | 0.801        | 0.876        | 0.990        | 0.857        | 0.959        | 0.430        |
| RNN                           | oeis    | 0.588             | <b>0.712</b> | 0.456         | 0.474        | n.a.         | 0.489        | 0.586        | <b>0.860</b> | <b>0.840</b> | <b>0.834</b> | <b>0.370</b> |
|                               | synth   | 0.790             | 0.788        | <b>0.828</b>  | <b>0.764</b> | <b>0.755</b> | 0.825        | 0.907        | <b>0.998</b> | <b>0.954</b> | <b>0.976</b> | <b>0.530</b> |
| CNN                           | oeis    | 0.569             | 0.550        | 0.619         | 0.470        | n.a.         | 0.483        | 0.514        | 0.800        | 0.575        | 0.694        | 0.220        |
|                               | synth   | 0.769             | 0.704        | 0.792         | 0.727        | 0.736        | 0.769        | 0.843        | 0.976        | 0.752        | 0.793        | 0.390        |
| Transformer                   | oeis    | 0.599             | 0.672        | 0.524         | 0.464        | n.a.         | 0.475        | 0.578        | 0.825        | 0.661        | 0.793        | 0.330        |
|                               | synth   | <b>0.791</b>      | 0.763        | 0.817         | 0.759        | 0.753        | 0.814        | 0.883        | 0.993        | 0.882        | 0.905        | 0.440        |
| KNNC                          | oeis    | 0.650             | 0.615        | 0.545         | 0.489        | n.a.         | 0.484        | 0.559        | 0.793        | 0.693        | 0.756        | 0.330        |
|                               | synth   | 0.760             | 0.765        | 0.797         | 0.707        | 0.713        | 0.810        | 0.896        | 0.994        | 0.883        | 0.890        | 0.410        |
| GNBC                          | oeis    | 0.626             | 0.276        | 0.560         | 0.464        | n.a.         | 0.474        | 0.476        | 0.810        | 0.683        | 0.667        | 0.230        |
|                               | synth   | 0.769             | 0.646        | 0.764         | 0.721        | 0.732        | 0.736        | 0.635        | 0.916        | 0.634        | 0.648        | 0.370        |
| LSVC                          | oeis    | <b>0.709</b>      | 0.377        | 0.646         | 0.410        | n.a.         | 0.485        | 0.508        | 0.763        | 0.546        | 0.637        | 0.310        |
|                               | synth   | 0.759             | 0.622        | 0.771         | 0.717        | 0.680        | 0.745        | 0.819        | 0.954        | 0.586        | 0.718        | 0.350        |
| DTC                           | oeis    | 0.618             | 0.607        | 0.497         | 0.480        | n.a.         | 0.483        | 0.558        | 0.820        | 0.624        | 0.727        | 0.360        |
|                               | synth   | 0.722             | 0.754        | 0.807         | 0.690        | 0.677        | 0.812        | 0.887        | 0.995        | 0.918        | 0.949        | 0.490        |
| RFC                           | oeis    | 0.595             | 0.680        | 0.507         | 0.493        | n.a.         | 0.468        | 0.563        | 0.843        | 0.579        | 0.787        | 0.340        |
|                               | synth   | 0.789             | <b>0.791</b> | <b>0.837</b>  | 0.759        | 0.749        | <b>0.830</b> | <b>0.908</b> | <b>0.998</b> | 0.938        | 0.963        | 0.510        |
| GBC                           | oeis    | 0.576             | 0.495        | 0.643         | 0.478        | n.a.         | 0.470        | 0.548        | 0.821        | 0.623        | 0.788        | 0.270        |
|                               | synth   | 0.785             | 0.746        | 0.804         | 0.758        | 0.751        | 0.803        | 0.872        | 0.990        | 0.835        | 0.860        | 0.400        |
| ABC                           | oeis    | 0.617             | 0.392        | <b>0.658</b>  | 0.470        | n.a.         | 0.457        | 0.497        | 0.782        | 0.511        | 0.691        | 0.310        |
|                               | synth   | 0.773             | 0.676        | 0.777         | 0.741        | 0.737        | 0.761        | 0.829        | 0.958        | 0.669        | 0.766        | 0.380        |
| XGBC                          | oeis    | 0.603             | 0.670        | 0.499         | 0.480        | n.a.         | 0.477        | <b>0.595</b> | 0.842        | 0.674        | 0.813        | 0.370        |
|                               | synth   | 0.789             | 0.782        | 0.828         | 0.762        | 0.754        | 0.827        | 0.901        | 0.997        | 0.915        | 0.962        | 0.510        |
| DYC                           | oeis    | 0.500             | 0.500        | 0.500         | <b>0.500</b> | n.a.         | <b>0.500</b> | 0.500        | 0.500        | 0.500        | 0.500        | 0.500        |
|                               | synth   | 0.500             | 0.500        | 0.500         | 0.500        | 0.500        | 0.500        | 0.500        | 0.500        | 0.500        | 0.500        | 0.500        |
| Next Sequence-Part Prediction |         | [binary-accuracy] |              |               |              |              |              |              |              |              |              |              |
| DNN                           | oeis    | 0.658             | 0.664        | 0.719         | 0.778        | n.a.         | 0.760        | 0.744        | 0.749        | 0.753        | 0.726        | 0.733        |
|                               | synth   | 0.941             | 0.927        | 0.940         | 0.943        | 0.939        | 0.918        | 0.914        | 0.943        | 0.924        | 0.936        | 0.943        |
| RNN                           | oeis    | <b>0.869</b>      | <b>0.890</b> | <b>0.827</b>  | <b>0.849</b> | n.a.         | <b>0.855</b> | <b>0.860</b> | <b>0.833</b> | <b>0.876</b> | <b>0.889</b> | <b>0.869</b> |
|                               | synth   | <b>0.988</b>      | <b>0.973</b> | <b>0.979</b>  | <b>0.987</b> | <b>0.988</b> | <b>0.972</b> | <b>0.955</b> | <b>0.978</b> | <b>0.982</b> | <b>0.976</b> | <b>0.984</b> |
| CNN                           | oeis    | 0.526             | 0.520        | 0.540         | 0.566        | n.a.         | 0.548        | 0.535        | 0.566        | 0.547        | 0.539        | 0.551        |
|                               | synth   | 0.893             | 0.912        | 0.922         | 0.903        | 0.895        | 0.898        | 0.890        | 0.915        | 0.885        | 0.901        | 0.900        |
| Transformer                   | oeis    | 0.690             | 0.666        | 0.707         | 0.792        | n.a.         | 0.759        | 0.747        | 0.752        | 0.744        | 0.737        | 0.736        |
|                               | synth   | 0.947             | 0.930        | 0.945         | 0.947        | 0.949        | 0.927        | 0.919        | 0.946        | 0.926        | 0.943        | 0.938        |

Table 6: The results for the classification and next sequence-part prediction, evaluated both within categories and across the whole dataset. MLP, RNN, and CNN stand for multi-layer perceptron, recurrent neural network, and convolutional neural network. **Emphasis** and **emphasis** mark the best performing models for the OEIS and synthetic data, respectively. For both F1 score and binary accuracy, higher is better.

| Model               | Dataset | Metric | Scope             |             |               |             |             |             |             |             |             |             |
|---------------------|---------|--------|-------------------|-------------|---------------|-------------|-------------|-------------|-------------|-------------|-------------|-------------|
|                     |         |        | Within            |             |               |             |             |             |             |             |             |             |
|                     |         |        | polynomial        | exponential | trigonometric | periodic    | finite      | modulo      | prime       | bounded     | increasing  | unique      |
| Sequence Similarity |         |        | [binary-accuracy] |             |               |             |             |             |             |             |             |             |
| DNN                 | oeis    | Top-1  | <b>0.20</b>       | <b>0.00</b> | 0.08          | 0.16        | n.a.        | 0.09        | 0.12        | 0.07        | <b>0.09</b> | 0.08        |
|                     |         | Top-3  | 0.23              | 0.00        | 0.19          | 0.16        | n.a.        | 0.23        | 0.21        | 0.29        | <b>0.32</b> | 0.26        |
|                     |         | Top-5  | 0.44              | 0.00        | 0.27          | 0.33        | n.a.        | 0.30        | 0.34        | 0.43        | 0.45        | 0.48        |
|                     | synth   | Top-1  | 0.12              | 0.13        | 0.19          | 0.10        | 0.09        | 0.11        | 0.32        | 0.10        | 0.07        | 0.09        |
|                     |         | Top-3  | 0.27              | 0.34        | 0.30          | 0.25        | 0.31        | 0.23        | 0.54        | 0.38        | 0.27        | 0.33        |
|                     |         | Top-5  | 0.43              | 0.46        | 0.44          | 0.44        | 0.40        | <b>0.57</b> | 0.69        | 0.57        | <b>0.44</b> | 0.48        |
| RNN                 | oeis    | Top-1  | 0.07              | <b>0.00</b> | 0.04          | <b>0.20</b> | n.a.        | <b>0.13</b> | 0.14        | 0.06        | 0.06        | 0.11        |
|                     |         | Top-3  | 0.25              | 0.00        | 0.27          | <b>0.50</b> | n.a.        | 0.35        | 0.16        | 0.34        | 0.31        | 0.25        |
|                     |         | Top-5  | <b>0.53</b>       | 0.00        | 0.40          | <b>0.50</b> | n.a.        | 0.41        | 0.34        | 0.45        | 0.44        | 0.42        |
|                     | synth   | Top-1  | 0.17              | 0.11        | 0.20          | 0.08        | 0.10        | <b>0.13</b> | 0.35        | 0.12        | 0.07        | 0.08        |
|                     |         | Top-3  | 0.32              | 0.29        | 0.39          | 0.32        | 0.32        | 0.25        | 0.56        | 0.40        | 0.29        | 0.32        |
|                     |         | Top-5  | 0.41              | 0.38        | 0.47          | 0.42        | 0.47        | 0.49        | <b>0.70</b> | 0.56        | 0.41        | 0.51        |
| CNN                 | oeis    | Top-1  | 0.15              | <b>0.00</b> | 0.06          | 0.00        | n.a.        | 0.06        | 0.16        | <b>0.14</b> | 0.07        | <b>0.15</b> |
|                     |         | Top-3  | <b>0.34</b>       | <b>0.12</b> | 0.31          | 0.00        | n.a.        | <b>0.38</b> | <b>0.32</b> | <b>0.43</b> | 0.26        | 0.36        |
|                     |         | Top-5  | 0.34              | <b>0.75</b> | 0.41          | 0.40        | n.a.        | 0.47        | <b>0.46</b> | <b>0.59</b> | 0.39        | 0.50        |
|                     | synth   | Top-1  | 0.09              | <b>0.14</b> | 0.16          | 0.07        | 0.13        | 0.11        | 0.32        | <b>0.17</b> | <b>0.08</b> | <b>0.10</b> |
|                     |         | Top-3  | 0.37              | <b>0.39</b> | 0.37          | <b>0.42</b> | 0.29        | <b>0.32</b> | <b>0.61</b> | 0.49        | 0.30        | <b>0.39</b> |
|                     |         | Top-5  | 0.50              | 0.41        | 0.60          | 0.48        | 0.47        | 0.51        | 0.66        | 0.64        | <b>0.44</b> | 0.60        |
| Transformer         | oeis    | Top-1  | 0.03              | <b>0.00</b> | <b>0.13</b>   | 0.00        | n.a.        | 0.05        | <b>0.18</b> | 0.11        | <b>0.09</b> | 0.09        |
|                     |         | Top-3  | 0.31              | 0.00        | <b>0.39</b>   | 0.10        | n.a.        | 0.33        | 0.28        | 0.42        | 0.29        | <b>0.38</b> |
|                     |         | Top-5  | 0.48              | 0.66        | <b>0.43</b>   | 0.20        | n.a.        | <b>0.49</b> | 0.40        | 0.50        | 0.43        | <b>0.55</b> |
|                     | synth   | Top-1  | <b>0.21</b>       | 0.13        | <b>0.31</b>   | <b>0.12</b> | <b>0.17</b> | 0.10        | <b>0.36</b> | 0.13        | 0.07        | <b>0.10</b> |
|                     |         | Top-3  | <b>0.44</b>       | 0.32        | <b>0.41</b>   | 0.41        | <b>0.37</b> | <b>0.32</b> | 0.56        | <b>0.50</b> | <b>0.32</b> | 0.35        |
|                     |         | Top-5  | <b>0.67</b>       | <b>0.52</b> | <b>0.63</b>   | <b>0.51</b> | <b>0.52</b> | 0.55        | 0.65        | <b>0.61</b> | <b>0.44</b> | <b>0.58</b> |

Table 7: The accuracy results for the sequence similarity task, evaluated both within categories and across the whole dataset. **Emphasis** and **emphasis** mark the best performing models for the OEIS and synthetic data, respectively. For binary accuracy, higher is better.

| Model                 | Dataset | Scope                         |              |               |              |              |              |              |              |              |              |              |
|-----------------------|---------|-------------------------------|--------------|---------------|--------------|--------------|--------------|--------------|--------------|--------------|--------------|--------------|
|                       |         | Within                        |              |               |              |              |              |              |              |              |              | Across       |
|                       |         | polynomial                    | exponential  | trigonometric | periodic     | finite       | modulo       | prime        | bounded      | increasing   | unique       | all classes  |
| Sequence Continuation |         | [root-mean-squared-log-error] |              |               |              |              |              |              |              |              |              |              |
| DNN                   | oeis    | 0.750                         | 0.700        | 0.588         | 0.576        | n.a.         | 0.567        | 0.617        | 0.519        | 0.600        | 0.614        | 0.597        |
|                       | synth   | 0.496                         | 0.408        | 0.345         | 0.485        | 0.489        | 0.398        | 0.379        | 0.372        | 0.477        | 0.452        | 0.430        |
| RNN                   | oeis    | <b>0.738</b>                  | <b>0.692</b> | <b>0.561</b>  | <b>0.561</b> | n.a.         | 0.554        | 0.602        | 0.506        | 0.577        | 0.614        | 0.603        |
|                       | synth   | <b>0.470</b>                  | <b>0.375</b> | 0.317         | <b>0.466</b> | 0.461        | 0.381        | 0.345        | 0.351        | 0.457        | 0.424        | 0.406        |
| CNN                   | oeis    | 0.776                         | 0.768        | 0.765         | 0.679        | n.a.         | 0.727        | 0.758        | 0.686        | 0.730        | 0.737        | 0.733        |
|                       | synth   | 0.586                         | 0.550        | 0.498         | 0.585        | 0.581        | 0.557        | 0.623        | 0.536        | 0.599        | 0.612        | 0.579        |
| Transformer           | oeis    | 1.632                         | 1.596        | 0.573         | 1.113        | n.a.         | <b>0.545</b> | <b>0.573</b> | <b>0.503</b> | <b>0.575</b> | <b>0.593</b> | <b>0.578</b> |
|                       | synth   | 2.051                         | 1.420        | <b>0.308</b>  | 1.978        | <b>0.452</b> | <b>0.365</b> | <b>0.335</b> | <b>0.341</b> | <b>0.449</b> | <b>0.415</b> | <b>0.395</b> |
| KNNR                  | oeis    | 0.955                         | 0.874        | 0.761         | 0.807        | n.a.         | 0.730        | 0.796        | 0.669        | 0.783        | 0.832        | 0.808        |
|                       | synth   | 0.575                         | 0.451        | 0.373         | 0.560        | 0.551        | 0.459        | 0.401        | 0.433        | 0.564        | 0.513        | 0.486        |
| LIR                   | oeis    | 0.872                         | 0.784        | 0.723         | 0.880        | n.a.         | 0.710        | 0.846        | 0.704        | 0.786        | 0.821        | 0.797        |
|                       | synth   | 0.694                         | 0.633        | 0.545         | 0.696        | 0.692        | 0.611        | 0.770        | 0.613        | 0.701        | 0.724        | 0.682        |
| RIR                   | oeis    | 0.873                         | 0.784        | 0.721         | 0.875        | n.a.         | 0.713        | 0.846        | 0.703        | 0.786        | 0.822        | 0.797        |
|                       | synth   | 0.692                         | 0.632        | 0.546         | 0.695        | 0.692        | 0.613        | 0.769        | 0.613        | 0.701        | 0.725        | 0.682        |
| LAR                   | oeis    | 0.910                         | 0.750        | 0.727         | 1.012        | n.a.         | 0.734        | 0.882        | 0.743        | 0.798        | 0.856        | 0.827        |
|                       | synth   | 0.750                         | 0.703        | 0.615         | 0.754        | 0.748        | 0.688        | 0.812        | 0.683        | 0.765        | 0.783        | 0.747        |
| ENR                   | oeis    | 0.886                         | 0.756        | 0.722         | 0.951        | n.a.         | 0.723        | 0.862        | 0.724        | 0.793        | 0.840        | 0.814        |
|                       | synth   | 0.722                         | 0.672        | 0.583         | 0.727        | 0.723        | 0.656        | 0.794        | 0.651        | 0.734        | 0.754        | 0.716        |
| DTR                   | oeis    | 0.868                         | 0.801        | 0.693         | 0.741        | n.a.         | 0.663        | 0.731        | 0.618        | 0.695        | 0.749        | 0.730        |
|                       | synth   | 0.496                         | 0.392        | 0.328         | 0.492        | 0.487        | 0.391        | 0.351        | 0.368        | 0.490        | 0.445        | 0.427        |
| RFR                   | oeis    | 0.871                         | 0.797        | 0.696         | 0.740        | n.a.         | 0.666        | 0.730        | 0.619        | 0.696        | 0.748        | 0.730        |
|                       | synth   | 0.496                         | 0.393        | 0.325         | 0.492        | 0.488        | 0.396        | 0.348        | 0.368        | 0.491        | 0.446        | 0.427        |
| GBR                   | oeis    | 0.857                         | 0.789        | 0.622         | 0.694        | n.a.         | 0.650        | 0.706        | 0.578        | 0.694        | 0.726        | 0.702        |
|                       | synth   | 0.544                         | 0.459        | 0.377         | 0.540        | 0.535        | 0.446        | 0.420        | 0.420        | 0.545        | 0.510        | 0.484        |
| ABR                   | oeis    | 0.907                         | 0.868        | 0.782         | 0.894        | n.a.         | 0.754        | 0.837        | 0.776        | 0.796        | 0.878        | 0.842        |
|                       | synth   | 0.635                         | 0.621        | 0.542         | 0.667        | 0.659        | 0.594        | 0.652        | 0.635        | 0.658        | 0.672        | 0.662        |
| XGBR                  | oeis    | 0.869                         | 0.796        | 0.679         | 0.726        | n.a.         | 0.651        | 0.707        | 0.607        | 0.688        | 0.735        | 0.719        |
|                       | synth   | 0.499                         | 0.400        | 0.330         | 0.497        | 0.490        | 0.400        | 0.360        | 0.372        | 0.496        | 0.452        | 0.433        |
| DYR                   | oeis    | 0.972                         | 0.770        | 0.821         | 1.202        | n.a.         | 0.788        | 0.912        | 0.883        | 0.860        | 0.930        | 0.923        |
|                       | synth   | 0.832                         | 0.868        | 0.807         | 0.847        | 0.844        | 0.858        | 0.877        | 0.866        | 0.876        | 0.871        | 0.877        |

Table 8: The results for the sequence continuation task, evaluated both within categories and across the whole dataset. **Emphasis** and **emphasis** mark the best performing models for the OEIS and synthetic data, respectively. For RMSLE, lower is better.

| Model               | Dataset | Metric | Scope                                    |              |               |              |              |              |              |              |              |              |              |
|---------------------|---------|--------|------------------------------------------|--------------|---------------|--------------|--------------|--------------|--------------|--------------|--------------|--------------|--------------|
|                     |         |        | Within                                   |              |               |              |              |              |              |              |              |              | Across       |
|                     |         |        | polynomial                               | exponential  | trigonometric | periodic     | finite       | modulo       | prime        | bounded      | increasing   | unique       | all classes  |
| Sequence Similarity |         |        | [ <i>top-k-root-mean-squared-error</i> ] |              |               |              |              |              |              |              |              |              |              |
| DNN                 | oeis    | Top-1  | 2.037                                    | 1.662        | 3.542         | 1.392        | n.a.         | 1.867        | 1.432        | 0.850        | 2.488        | 1.300        | 2.668        |
|                     |         | Top-3  | 0.931                                    | 1.662        | 0.442         | 0.390        | n.a.         | 0.785        | 0.587        | 0.367        | 0.900        | 0.912        | 0.599        |
|                     |         | Top-5  | 0.855                                    | 1.662        | 0.361         | <b>0.152</b> | n.a.         | 0.696        | 0.433        | <b>0.250</b> | 0.561        | 0.912        | 0.301        |
|                     | synth   | Top-1  | 5.847                                    | 3.261        | 5.616         | 2.790        | 2.695        | 1.597        | 1.896        | 3.951        | 2.153        | 2.302        | 2.144        |
|                     |         | Top-3  | 0.870                                    | 0.927        | 0.365         | 1.192        | 1.483        | 0.475        | 1.246        | 0.534        | 1.130        | 1.900        | 1.690        |
|                     |         | Top-5  | 0.752                                    | 0.549        | 0.365         | 0.766        | 1.483        | 0.448        | 0.944        | 0.534        | 0.825        | 0.520        | 1.690        |
| RNN                 | oeis    | Top-1  | 2.089                                    | 2.278        | 1.624         | 1.735        | n.a.         | 1.326        | 1.831        | 1.264        | 1.473        | 1.450        | 1.367        |
|                     |         | Top-3  | 1.038                                    | 1.025        | 0.677         | 0.661        | n.a.         | 0.645        | 0.823        | 0.597        | 0.617        | 0.658        | 0.596        |
|                     |         | Top-5  | 0.706                                    | 0.665        | 0.429         | 0.439        | n.a.         | 0.435        | 0.585        | 0.406        | 0.427        | 0.457        | 0.383        |
|                     | synth   | Top-1  | 1.889                                    | 1.488        | 0.974         | 2.193        | 2.331        | 1.034        | 1.210        | 1.290        | 1.453        | 1.604        | 1.509        |
|                     |         | Top-3  | 0.784                                    | 0.566        | 0.405         | 0.954        | 1.033        | 0.448        | 0.508        | 0.589        | 0.654        | 0.713        | 0.667        |
|                     |         | Top-5  | 0.506                                    | 0.364        | 0.244         | 0.595        | 0.607        | 0.290        | 0.320        | 0.355        | 0.401        | 0.476        | 0.438        |
| CNN                 | oeis    | Top-1  | 3.117                                    | 2.943        | 1.957         | 1.715        | n.a.         | 2.426        | 1.570        | 1.430        | 1.950        | 1.490        | 1.825        |
|                     |         | Top-3  | 1.309                                    | 1.302        | 0.679         | 0.813        | n.a.         | 1.046        | 0.702        | 0.501        | 0.579        | 1.003        | 0.807        |
|                     |         | Top-5  | 0.631                                    | 0.646        | 0.585         | 0.521        | n.a.         | 0.736        | <b>0.361</b> | 0.296        | 0.406        | 0.711        | 0.428        |
|                     | synth   | Top-1  | 2.475                                    | 1.662        | 1.399         | 3.533        | 2.338        | 1.848        | 7.013        | 2.288        | 2.333        | 2.033        | 2.348        |
|                     |         | Top-3  | 1.060                                    | 0.695        | 1.115         | 1.031        | 1.151        | 0.880        | 1.007        | 1.152        | 0.826        | 0.871        | 1.105        |
|                     |         | Top-5  | 0.664                                    | 0.440        | 0.836         | 0.777        | 0.697        | 0.647        | 0.648        | 0.682        | 0.463        | 0.613        | 0.643        |
| Transformer         | oeis    | Top-1  | <b>1.503</b>                             | <b>1.408</b> | <b>0.984</b>  | <b>0.786</b> | n.a.         | <b>0.977</b> | <b>1.161</b> | <b>0.663</b> | <b>1.022</b> | <b>0.935</b> | <b>0.847</b> |
|                     |         | Top-3  | <b>0.746</b>                             | <b>0.748</b> | <b>0.398</b>  | <b>0.382</b> | n.a.         | <b>0.454</b> | <b>0.584</b> | <b>0.348</b> | <b>0.499</b> | <b>0.438</b> | <b>0.383</b> |
|                     |         | Top-5  | <b>0.529</b>                             | <b>0.524</b> | <b>0.253</b>  | 0.287        | n.a.         | <b>0.285</b> | 0.414        | 0.284        | <b>0.376</b> | <b>0.288</b> | <b>0.267</b> |
|                     | synth   | Top-1  | <b>1.816</b>                             | <b>0.962</b> | <b>0.788</b>  | <b>1.730</b> | <b>1.651</b> | <b>0.811</b> | <b>0.801</b> | <b>0.873</b> | <b>1.084</b> | <b>1.198</b> | <b>1.258</b> |
|                     |         | Top-3  | <b>0.727</b>                             | <b>0.410</b> | <b>0.312</b>  | <b>0.787</b> | <b>0.706</b> | <b>0.316</b> | <b>0.331</b> | <b>0.389</b> | <b>0.447</b> | <b>0.507</b> | <b>0.490</b> |
|                     |         | Top-5  | <b>0.448</b>                             | <b>0.248</b> | <b>0.202</b>  | <b>0.484</b> | <b>0.418</b> | <b>0.225</b> | <b>0.205</b> | <b>0.233</b> | <b>0.270</b> | <b>0.331</b> | <b>0.284</b> |
| Sequence Unmasking  |         |        | [ <i>top-k-root-mean-squared-error</i> ] |              |               |              |              |              |              |              |              |              |              |
| DNN                 | oeis    | Top-1  | 3.702                                    | <b>3.529</b> | <b>3.460</b>  | 3.248        | n.a.         | 3.451        | <b>3.451</b> | 3.274        | <b>3.307</b> | 3.315        | 3.384        |
|                     |         | Top-3  | 3.305                                    | 3.163        | 2.936         | 2.917        | n.a.         | 3.114        | 3.059        | 2.976        | 3.061        | 3.027        | 3.061        |
|                     |         | Top-5  | 3.125                                    | 3.000        | 2.748         | 2.779        | n.a.         | 2.972        | 2.880        | 2.878        | 2.925        | 2.903        | 2.918        |
|                     | synth   | Top-1  | 4.240                                    | 3.711        | 3.374         | 4.062        | 4.092        | 3.633        | 3.786        | 3.619        | 3.839        | 3.766        | 3.855        |
|                     |         | Top-3  | 3.898                                    | 3.448        | 2.958         | 3.710        | 3.744        | 3.353        | 3.321        | 3.356        | 3.547        | 3.470        | 3.524        |
|                     |         | Top-5  | 3.776                                    | 3.335        | 2.825         | 3.582        | 3.593        | 3.239        | 3.161        | 3.236        | 3.441        | 3.361        | 3.408        |
| RNN                 | oeis    | Top-1  | 3.789                                    | 3.720        | 3.548         | 3.314        | n.a.         | 3.484        | 3.499        | 3.320        | 3.490        | 3.485        | 3.455        |
|                     |         | Top-3  | 3.206                                    | 3.175        | 3.052         | 2.876        | n.a.         | 3.060        | 2.998        | 2.908        | 3.109        | 3.083        | 3.091        |
|                     |         | Top-5  | 3.010                                    | 2.990        | 2.847         | 2.688        | n.a.         | 2.898        | 2.830        | 2.757        | 2.925        | 2.909        | 2.944        |
|                     | synth   | Top-1  | 4.141                                    | 3.765        | 3.368         | 4.094        | 4.115        | 3.535        | 3.775        | 3.696        | 3.674        | 3.913        | 3.855        |
|                     |         | Top-3  | 3.663                                    | 3.463        | 3.082         | 3.639        | 3.663        | 3.254        | 3.314        | 3.346        | 3.328        | 3.515        | 3.511        |
|                     |         | Top-5  | 3.473                                    | 3.291        | 2.961         | 3.472        | 3.507        | 3.140        | 3.162        | 3.197        | 3.208        | 3.370        | 3.379        |
| CNN                 | oeis    | Top-1  | 3.738                                    | 3.699        | 3.615         | 3.268        | n.a.         | <b>3.383</b> | 3.521        | <b>3.165</b> | 3.453        | <b>3.257</b> | <b>3.355</b> |
|                     |         | Top-3  | <b>2.943</b>                             | <b>2.922</b> | <b>2.873</b>  | <b>2.594</b> | n.a.         | <b>2.683</b> | <b>2.785</b> | <b>2.510</b> | <b>2.727</b> | <b>2.643</b> | <b>2.690</b> |
|                     |         | Top-5  | <b>2.689</b>                             | <b>2.631</b> | <b>2.577</b>  | <b>2.370</b> | n.a.         | <b>2.437</b> | <b>2.539</b> | <b>2.260</b> | <b>2.490</b> | <b>2.423</b> | <b>2.440</b> |
|                     | synth   | Top-1  | <b>3.906</b>                             | <b>3.584</b> | <b>3.223</b>  | <b>3.791</b> | <b>3.886</b> | 3.500        | 3.646        | <b>3.531</b> | <b>3.627</b> | <b>3.702</b> | <b>3.611</b> |
|                     |         | Top-3  | <b>3.179</b>                             | <b>3.100</b> | <b>2.811</b>  | <b>3.128</b> | <b>3.168</b> | <b>2.968</b> | <b>3.112</b> | <b>3.008</b> | <b>2.988</b> | <b>3.122</b> | <b>3.033</b> |
|                     |         | Top-5  | <b>2.931</b>                             | <b>2.799</b> | <b>2.642</b>  | <b>2.891</b> | <b>2.898</b> | <b>2.784</b> | <b>2.890</b> | <b>2.834</b> | <b>2.747</b> | <b>2.899</b> | <b>2.812</b> |
| Transformer         | oeis    | Top-1  | <b>3.635</b>                             | 3.674        | 3.586         | <b>3.245</b> | n.a.         | 3.465        | 3.556        | 3.378        | 3.456        | 3.606        | 3.524        |
|                     |         | Top-3  | 3.042                                    | 3.045        | 2.951         | 2.798        | n.a.         | 2.991        | 2.974        | 2.903        | 2.947        | 3.038        | 3.017        |
|                     |         | Top-5  | 2.820                                    | 2.781        | 2.658         | 2.606        | n.a.         | 2.808        | 2.717        | 2.717        | 2.756        | 2.816        | 2.811        |
|                     | synth   | Top-1  | 3.953                                    | 3.719        | 3.403         | 3.968        | 4.079        | <b>3.478</b> | <b>3.638</b> | 3.605        | 3.717        | 3.780        | 3.757        |
|                     |         | Top-3  | 3.374                                    | 3.259        | 3.019         | 3.395        | 3.475        | 3.190        | 3.115        | 3.226        | 3.293        | 3.359        | 3.291        |
|                     |         | Top-5  | 3.171                                    | 3.067        | 2.872         | 3.161        | 3.259        | 3.041        | 2.941        | 3.045        | 3.121        | 3.173        | 3.091        |

Table 9: The top- $k$  RMSE results for the sequence similarity and unmasking tasks, evaluated both within categories and across the whole dataset. **Emphasis** and **emphasis** mark the best performing models for the OEIS and synthetic data, respectively. The masking probability is 0.25. For top- $k$ -RMSE, lower is better.

## D.1 Compute Time Breakdown

| Model                                                    | Task                  |                        |                     |                   |                  |
|----------------------------------------------------------|-----------------------|------------------------|---------------------|-------------------|------------------|
|                                                          | <i>classification</i> | <i>next part pred.</i> | <i>continuation</i> | <i>similarity</i> | <i>unmasking</i> |
| <i>mean task training and evaluation time in minutes</i> |                       |                        |                     |                   |                  |
| DNN                                                      | 23                    | 214                    | 98                  | 32                | 168              |
| RNN                                                      | 44                    | 428                    | 234                 | 57                | 345              |
| CNN                                                      | 35                    | 388                    | 198                 | 48                | 246              |
| Transformer                                              | 48                    | 465                    | 256                 | 45                | 326              |
| KNNC                                                     | 67                    | -                      | -                   | -                 | -                |
| GNBC                                                     | 7                     | -                      | -                   | -                 | -                |
| DTC                                                      | 14                    | -                      | -                   | -                 | -                |
| XGBC                                                     | 17                    | -                      | -                   | -                 | -                |
| LSVC                                                     | 26                    | -                      | -                   | -                 | -                |
| RFC                                                      | 14                    | -                      | -                   | -                 | -                |
| GBC                                                      | 9                     | -                      | -                   | -                 | -                |
| ABC                                                      | 23                    | -                      | -                   | -                 | -                |
| XGBC                                                     | 11                    | -                      | -                   | -                 | -                |
| KNNR                                                     | -                     | -                      | -                   | 72                | -                |
| RIR                                                      | -                     | -                      | -                   | 42                | -                |
| LIR                                                      | -                     | -                      | -                   | 37                | -                |
| ENR                                                      | -                     | -                      | -                   | 61                | -                |
| LAR                                                      | -                     | -                      | -                   | 58                | -                |
| DTR                                                      | -                     | -                      | -                   | 50                | -                |
| ABR                                                      | -                     | -                      | -                   | 24                | -                |
| GBR                                                      | -                     | -                      | -                   | 27                | -                |
| DYR                                                      | -                     | -                      | -                   | 36                | -                |
| XGBR                                                     | -                     | -                      | -                   | 22                | -                |
| RFR                                                      | -                     | -                      | -                   | 28                | -                |
| LSVR                                                     | -                     | -                      | -                   | 41                | -                |

Table 10: The mean combined task training and evaluation time per baseline model. Where applicable (cf. Appendix D), the mean is computed across all model runs for various sections of the dataset.



## E Expectations on Model Performance

We believe that our the baseline classifier performance can be vastly improved on and shifted towards the region of 0.8 to 0.9. We would expect tailored models to have near-perfect performance on the next part prediction task, RMSLEs of below 0.3 (corresponding to 0.3 uniform sequence element logarithm difference) in the continuation task, and top-5-RMSEs in the similarity and unmasking tasks of below 0.1 and 1.0, respectively.

Especially in the sequence similarity task, which is essentially a database lookup task, we would hope that the top- $k$ -RMSE performance on the synthetic test set could be brought to essentially zero. The OEIS dataset, however, contains many sequences that belong to the categories used for the experiments run in Section 4 but are very different from what one would achieve by procedural generation as per Appendix B. We therefore do not think it feasible for the currently known architectures could achieve near-perfect results on this set, but see this as a natural challenge for architectures yet to be proposed.

An argument could be made that a human, if faced with the task of even just identifying the category of many of the sequences in OEIS, would struggle greatly and perhaps soon resort to guesswork. The existence of Online Encyclopedia of Integer Sequences alone is a proof of that understanding integer sequences for what they are is, in practice, very often beyond the computational abilities of humans and demands thorough, encyclopedic knowledge instead. By extension, one could be tempted to claim that our effort goes in the wrong direction with respect to the general motivation of artificial intelligence research, as the problem we are considering is much more difficult than what one would consider the natural baseline for intelligence – human performance – can reliably handle. This dilemma of “turning the tables in the Turing test” was popularised and partially answered in [28]. Let us just simply invoke the argument of the Turing test “in the limit”, in which the human participant would have enough time and resources to develop a mechanism that would allow him to begin answering the trial’s questions at computer-level speeds. Then, the apparent difficulty of our benchmark is no longer in contrast with the common conception of intelligence, and furthermore, the development of such a mechanism is precisely something we hope will be facilitated by the benchmark presented in this paper.

The utility of our benchmark, however, can be seen even when disregarding this somewhat philosophical challenge. The existence of OEIS as an online service proves demand for a system that “understands” sequences, and perhaps continues them, fills their gaps, and suggests similar sequences on top of immediately identifying which category the sequence belongs to. Our benchmark can thus be viewed as a sort of “CodeSearchNet [17] for sequences”, built to aid the development of models that can satisfy this demand.

## **F Relationship to Symbolic Regression**

One can notice that contemporary symbolic regression methods could be deemed suitable for performing the unmasking task, or at least its easier variant – the continuation task. We emphasise that the aim of the FACT toolkit is not to address these tasks as challenges, but instead to provide tools for research on the learning of finitary abstractions.

With this motivation in mind, there seems to be little evidence that classical symbolic regression methods manage to abstract any high-level descriptive information about the data they fit in their regression process. Indeed, many of the methods used for symbolic regression perform systematic searches of hypothesis space of potential formulas. While perhaps guided by sound empirical search methods and well-founded heuristics, they do not learn, and they do not learn to abstract anything about the nature of the sequences they regress. Further, many of these methods make precisely the assumptions of simplicity of the underlying generative rule we make in our generative process, which would render their baseline evaluation results vacuous. As such, we have therefore decided against their inclusion in this work, and believe that while state-of-the-art symbolic regression methods may play a role as performance contenders for future studies leveraging FACT, they would be difficult to interpret as natural baselines for finitary abstraction learning.

## G An Illustrative Qualitative Evaluation of GPT-3 Davinci

We qualitatively evaluate the performance of GPT-3 Davinci on initial segments of length 10 of the 6 most popular OEIS sequences for two tasks: sequence classification, and sequence continuation. Our operating assumption is that the most popular sequences have been sufficiently present in the GPT-3 training data for the model to have a solid amount of information learned about them. We have chosen temperature of 0.7, maximum length of 256, top P of 1, frequency and presence penalty of 0, and “best of” of 1.

PROMPT: [*Continue the following sequence:*] 1, 1, 2, 3, 5, 8, 13, 21, 34, 55

GPT-3 DAVINCI: 89

BASELINE TRANSFORMER: 89

TRUE (ASSUMING FIBONACCI’S SEQUENCE): 89

PROMPT: [*Continue the following sequence:*] 0, 1, 3, 6, 2, 7, 13, 20, 12, 21

GPT-3 DAVINCI: 27, 28, 30, 33, 34, 36, 39, 40, 42, 45

BASELINE TRANSFORMER: 11, 22, 10, 23, 9, 24, 8, 25, 43, 62

TRUE (ASSUMING RECAMAN’S SEQUENCE): 11, 22, 10, 23, 9, 24, 8, 25, 43, 62

PROMPT: [*Continue the following sequence:*] 1, 1, 2, 5, 14, 42, 132, 429, 1430, 4862

GPT-3 DAVINCI: The next number in the sequence would be 16796.

BASELINE TRANSFORMER: 16796

TRUE (ASSUMING CATALAN NUMBERS): 16796

PROMPT: [*Continue the following sequence:*] 2, 3, 5, 7, 11, 13, 17, 19, 23, 29

GPT-3 DAVINCI: 31, 37, 41, 43, 47, 53, 59, 61, 67, 71

BASELINE TRANSFORMER: 31, 37, 41, 43, 47, 53, 59, 61, 67, 71

TRUE (ASSUMING PRIME NUMBERS): 31, 37, 41, 43, 47, 53, 59, 61, 67, 71

PROMPT: [*Continue the following sequence:*] 2, 3, 5, 7, 13, 17, 19, 31, 61, 89

GPT-3 DAVINCI: 131, 233, 337, 461, 563, 673, 761, 829, 937, 1033

BASELINE TRANSFORMER: 107, 127, 521, 607, 1279, 2203, 2281, 3217, 4253, 4423

TRUE (ASSUMING MERSENNE EXPONENTS): 107, 127, 521, 607, 1279, 2203, 2281, 3217, 4253, 4423

PROMPT: [*Continue the following sequence:*] 3, 7, 31, 127, 8191, 131071, 524287, 2147483647, 2305843009213693951, 618970019642690137449562111

GPT-3 DAVINCI: 618970019642690137449562111, 36893488147419103232, 1085102592571150095, 33554431,

BASELINE TRANSFORMER: *Too big, the sequence was not included*

TRUE (ASSUMING MERSENNE PRIMES): 162259276829213363391578010288127, 170141183460469231731687303715884105727

We observe that the GPT-3 sometimes performs well, although it takes liberties as to how it presents its output. We further saw that our baseline transformer implementation for this task was consistently correct.

PROMPT: [*Classify the following sequence:*] 1, 1, 2, 3, 5, 8, 13, 21, 34, 55

GPT-3 DAVINCI: The sequence is an example of the Fibonacci sequence.

BASELINE TRANSFORMER: *N/A*

TRUE (ASSUMING FIBONACCI’S SEQUENCE): Fibonacci sequence.

PROMPT: [Continue the following sequence: ] 0, 1, 3, 6, 2, 7, 13, 20, 12, 21

GPT-3 DAVINCI: The sequence is made up of numbers that follow the pattern of adding the two most recent numbers together. This pattern is known as a Fibonacci sequence.

BASELINE TRANSFORMER: *N/A*

TRUE (ASSUMING RECAMAN'S SEQUENCE): Recamán's sequence.

PROMPT: [Continue the following sequence: ] 1, 1, 2, 5, 14, 42, 132, 429, 1430, 4862

GPT-3 DAVINCI: The sequence appears to be the Fibonacci sequence.

BASELINE TRANSFORMER: *N/A*

TRUE (ASSUMING CATALAN NUMBERS): Catalan numbers.

PROMPT: [Continue the following sequence: ] 2, 3, 5, 7, 11, 13, 17, 19, 23, 29

GPT-3 DAVINCI: 31, 37, 41, 43, 47, 53, 59, 61, 67, 71

BASELINE TRANSFORMER CLASSIFIER: Prime.

TRUE (ASSUMING PRIME NUMBERS): Prime.

PROMPT: [Continue the following sequence: ] 2, 3, 5, 7, 13, 17, 19, 31, 61, 89

GPT-3 DAVINCI: The sequence is a prime number sequence.

BASELINE TRANSFORMER: Prime.

TRUE (ASSUMING MERSENNE EXPONENTS): Prime.

PROMPT: [Continue the following sequence: ] 3, 7, 31, 127, 8191, 131071, 524287, 2147483647, 2305843009213693951, 618970019642690137449562111

GPT-3 DAVINCI: The sequence appears to be a list of powers of two, with the exception of the third number.

BASELINE TRANSFORMER: *Too big, the sequence was not included*

TRUE (ASSUMING MERSENNE PRIMES): Prime, or rather, primes  $p$  such that  $2^p - 1$  is a prime.

Here we observe that the GPT-3 is sometimes right, but sometimes just assumes a sequence based on its popularity, or misses crucial detail.

## H Datasheets for Datasets

For the dataset documentation we used the recommended documentation framework "Datasheets for Datasets" [12].

### H.1 Motivation

**For what purpose was the dataset created?** To advance research in comprehension of finitary abstractions.

**Who created the dataset?** The dataset is a combination of the efforts of contributors to the Online Encyclopedia of Integer Sequences and our own systematic synthetic data generation effort. All those who contributed, directly and indirectly, are given credit in Acknowledgements. We will aim to keep acknowledgements in our GitHub repository up-to-date as the work on the dataset continues in the future.

**Who funded the creation of the dataset? If there is an associated grant, please provide the name of the grantor and the grant name and number** [N/A]

**Any other comments?** [N/A]

### H.2 Composition

**What do the instances that comprise the dataset represent (e.g., documents, photos, people, countries)? Are there multiple types of instances (e.g., movies, users, and ratings; people and interactions between them; nodes and edges)?** The dataset consists of integer sequences – or rather, initial segments of integer sequences, and in most cases also annotations that allow for their automatic continuation if necessary.

**How many instances are there in total (of each type, if appropriate)?** See Section 2. Short answer: About 3.6 million.

**Does the dataset contain all possible instances or is it a sample (not necessarily random) of instances from a larger set?** It is a well-structured of a larger set as there are infinitely many integer sequences.

**What data does each instance consist of? “Raw” data (e.g., unprocessed text or images) or features?** Annotated entries pointing to integer sequences.

**Is there a label or target associated with each instance? If so, please provide a description** [Yes] All labels and targets are described in Section 3 and further Appendix A.

**Is any information missing from individual instances? If so, please provide a description, explaining why this information is missing (e.g., because it was unavailable). This does not include intentionally removed information, but might include, e.g., redacted text.** [N/A]

**Are relationships between individual instances made explicit (e.g., users’ movie ratings, social network links)?** [N/A]

**Are there recommended data splits (e.g., training, development/validation, testing)?** [Yes] We have used 10:1:1 ratio of our synthetic training, synthetic testing, and organic testing sets in the benchmarking setup. Data split in the fashion is separately available through the ETH Research Collection, see [5].

**Are there any errors, sources of noise, or redundancies in the dataset?** [No]

**Is the dataset self-contained, or does it link to or otherwise rely on external resources (e.g., websites, tweets, other datasets)?** The dataset is self-contained, there are no restrictions associated with any of the external resources that might apply to a future user.

**Does the dataset contain data that might be considered confidential?** [No]

**Does the dataset contain data that, if viewed directly, might be offensive, insulting, threatening, or might otherwise cause anxiety?** [No]

**Does the dataset relate to people?** [No]

**Does the dataset identify any subpopulations (e.g., by age, gender)?** [No]

**Is it possible to identify individuals (i.e., one or more natural persons), either directly or indirectly (i.e., in combination with other data) from the dataset?** [No]

**Does the dataset contain data that might be considered sensitive in any way** (e.g., data that reveals racial or ethnic origins, sexual orientations, religious beliefs, political opinions or union memberships, or locations; financial or health data; biometric or genetic data; forms of government identification, such as social security numbers; criminal history)? [No]

**Any other comments?** [N/A]

### H.3 Collection Process

**How was the data associated with each instance acquired? Was the data directly observable (e.g., raw text, movie ratings), reported by subjects (e.g., survey responses), or indirectly inferred/derived from other data (e.g., part-of-speech tags, model-based guesses for age or language)?** [Yes] The collection and generation processes are extensively described in Section 3, Appendix A, Appendix B.

**What mechanisms or procedures were used to collect the data (e.g., hardware apparatus or sensor, manual human curation, software program, software API)? How were these mechanisms or procedures validated?** [Yes] The collection and generation processes are extensively described in Section 3, Appendix A, Appendix B.

**If the dataset is a sample from a larger set, what was the sampling strategy (e.g., deterministic, probabilistic with specific sampling probabilities)?** [Yes] The collection and generation processes are extensively described in Section 3, Appendix A, Appendix B.

**Who was involved in the data collection process (e.g., students, crowdworkers, contractors) and how were they compensated (e.g., how much were crowdworkers paid)?** [N/A]

**Over what timeframe was the data collected?** [N/A]

**Were any ethical review processes conducted (e.g., by an institutional review board)?** [N/A]

**Does the dataset relate to people?** [No]

**Did you collect the data from the individuals in question directly, or obtain it via third parties or other sources (e.g., websites)?** [N/A]

**Were the individuals in question notified about the data collection?** [N/A]

**Did the individuals in question consent to the collection and use of their data?** [N/A]

**Has an analysis of the potential impact of the dataset and its use on data subjects (e.g., a data protection impact analysis) been conducted?** [N/A]

**Any other comments?** [N/A]

#### H.4 Preprocessing/cleaning/labeling

**Was any preprocessing/cleaning/labeling of the data done (e.g., discretization or bucketing, tokenization, part-of-speech tagging, SIFT feature extraction, removal of instances, processing of missing values)?** [Yes] The collection, preprocessing, and generation processes are extensively described in Section 3, Appendix A, Appendix B.

**Was the “raw” data saved in addition to the preprocessed/cleaned/labeled data (e.g., to support unanticipated future uses)**

**Is the software used to preprocess/clean/label the instances available? If so, please provide a link or other access point.** [Yes] See the project code repository.

**Any other comments?** [N/A]

#### H.5 Uses

**Has the dataset been used for any tasks already?** [Yes] See Section 4.

**Is there a repository that links to any or all papers or systems that use the dataset?** [N/A]

**What (other) tasks could the dataset be used for?** [Yes] See Section 6.

**Is there anything about the composition of the dataset or the way it was collected and preprocessed/cleaned/labeled that might impact future uses?** [N/A]

**Are there tasks for which the dataset should not be used?** [No]

**Any other comments?** [N/A]

#### H.6 Distribution

**How will the dataset will be distributed (e.g., tarball on website, API, GitHub)? Does the dataset have a digital object identifier (DOI)?** The dataset is available through the ETH Research Collection (DOI 10.3929/ethz-b-000562705, [5]). The library (DOI 10.3929/ethz-b-000565638, [6]) and benchmarking models (DOI 10.3929/ethz-b-000565644, [5]) are also available from the same source, and they too have their individual DOIs.

**When will the dataset be distributed?** The dataset is available through the ETH Research Collection, see [5].

**Will the dataset be distributed under a copyright or other intellectual property (IP) license, and/or under applicable terms of use (ToU)?** The dataset is distributed under the terms of the Creative Commons CC BY license, which permits non-commercial use, distribution, and reproduction in any medium, provided the original work is properly cited.

**Have any third parties imposed IP-based or other restrictions on the data associated with the instances?** [Yes] Our license is in agreement with the license of the OEIS.

**Do any export controls or other regulatory restrictions apply to the dataset or to individual instances?** [No]

**Any other comments** [N/A]

#### H.7 Maintenance

**Who is supporting/hosting/maintaining the dataset?** The dataset is maintained by the FACT Development Team, <https://github.com/FACT-Development-Team>. In practice, this subsumes

individual from the ETH D-ITET ISG and DISCO groups. The hosting of the dataset is maintained by the ETH Research Collection [5, 6, 4].

**How can the owner/curator/manager of the dataset be contacted (e.g., email address)?** Email address: fact@ethz.ch. Should this email address become unavailable in the future, please address your correspondence at members of ETH D-ITET DISCO.

**Is there an erratum? If so, please provide a link or other access point** [No]

**Will the dataset be updated (e.g., to correct labeling errors, add new instances, delete instances)?** [Yes] The dataset will be regularly updated, information about each update will be published in our repository.

**If the dataset relates to people, are there applicable limits on the retention of the data associated with the instances (e.g., were individuals in question told that their data would be retained for a fixed period of time and then deleted)?** [N/A] .

**Will older versions of the dataset continue to be supported/hosted/maintained?** [Yes] Yes, all published versions of the dataset will be available through the ETH Research Collection.

**If others want to extend/augment/build on/contribute to the dataset, is there a mechanism for them to do so?** [Yes] We release our complete infrastructure and provide a simple and easy-to-use interface to evaluate new methods. We invite the users of the dataset to submit their suggested contributions either directly to the authors or as pull requests through the GitHub system. The alternative is to contact us at fact@ethz.ch to arrange closer collaboration if desired.

**Any other comments?** [N/A]

## **I Author Statement**

The authors of this work confirm that all parts of the content they publish conform to the licensing requirements of the individual parts, and that new additions are licenses accordingly. They further declare that they bear all responsibility in case of violation of any rights.
